# Supplementary material
Source: PubMed Central journal article supplement (PMC4938203)
Supplement: 10.1074_M116.716829_jbc.M116.716829-1.pdf [file 10.1074_M116.716829_jbc.M116.716829-1.pdf]

## **Supplemental data**

Xyloside-primed Chondroitin Sulfate/Dermatan Sulfate from Breast Carcinoma Cells with a Defined Disaccharide Composition has Cytotoxic Effects *In Vitro*

Andrea Persson, Emil Tykesson, Gunilla Westergren-Thorsson, Anders Malmström, Ulf Ellervik, and Katrin Mani

**Tables S1 and S2**

TABLE S1. **Disaccharide fingerprint of xyloside-primed GAGs and PG-GAGs from HCC70 cells and CCD-1095Sk cells.** Disaccharides from the indicated xyloside-primed GAGs, PG-GAGs, CS A, CS B, and CS C obtained after degradation with chondroitinase ABC, chondroitinase AC-I and –II, or chondroitinase B, followed by AMAC-labeling, and HPLC. The molar percent is calculated based on disaccharide standards of known quantity, and refers to the total molar amount of degraded material by the different enzymes. The percent of total is calculated based on the total amounts (in ng) of all of the disaccharides (including the heparinase I-III-generated ones). The data are means of two independent experiments  $\pm$  S.D., unless otherwise stated.

| GAGs                                             |                    | Disaccharides (mol% $\pm$ SD) |                              |                              |                           |                           |                        | % of total |
|--------------------------------------------------|--------------------|-------------------------------|------------------------------|------------------------------|---------------------------|---------------------------|------------------------|------------|
|                                                  |                    | $\Delta$ UA,2S-GalNAc,4S (B)  | $\Delta$ UA-GalNAc,4S,6S (E) | $\Delta$ UA,2S-GalNAc,6S (D) | $\Delta$ UA-GalNAc,4S (A) | $\Delta$ UA-GalNAc,6S (C) | $\Delta$ UA-GalNAc (O) |            |
| <b>XylNapOH-primed GAGs</b><br><b>24 h HCC70</b> | Chondroitinase ABC | -                             | 2.8 $\pm$ 0.4                | 0.25 $\pm$ 0.1               | 14 $\pm$ 0.8              | 81 $\pm$ 3.6              | -/3.5 <sup>a</sup>     | 93         |
|                                                  | Chondroitinase AC  | -                             | 1.2 $\pm$ 0.1                | -                            | 7.5 $\pm$ 0.6             | 90 $\pm$ 0.6              | 0.93 $\pm$ 0.1         | 74         |
|                                                  | Chondroitinase B   | -                             | 25 $\pm$ 5.1                 | -                            | 75 $\pm$ 5.1              | -                         | -                      | 2.2        |
| <b>XylNapOH-primed GAGs</b><br><b>48 h HCC70</b> | Chondroitinase ABC | -                             | 2.6 $\pm$ 0.5                | 0.38 $\pm$ 0.1               | 14 $\pm$ 0.9              | 83 $\pm$ 1.3              | 0.17 $\pm$ 0.1         | 80         |
|                                                  | Chondroitinase AC  | -                             | 1.2 $\pm$ 0.2                | -                            | 7.7 $\pm$ 0.2             | 90 $\pm$ 0.4              | 0.71 $\pm$ 0.4         | 65         |
|                                                  | Chondroitinase B   | -                             | 24 $\pm$ 1.4                 | -                            | 76 $\pm$ 1.4              | -                         | -                      | 1.5        |
| <b>XylNapOH-primed GAGs</b><br><b>72 h HCC70</b> | Chondroitinase ABC | -                             | 2.8 $\pm$ 0.4                | -/0.23 <sup>a</sup>          | 16 $\pm$ 0.1              | 81 $\pm$ 0.2              | 0.49 $\pm$ 0.3         | 75         |
|                                                  | Chondroitinase AC  | -                             | 1.3 $\pm$ 0.1                | -                            | 8.7 $\pm$ 1.3             | 89 $\pm$ 1.6              | 0.76 $\pm$ 0.3         | 56         |
|                                                  | Chondroitinase B   | -                             | 19 $\pm$ 5.4                 | -                            | 81 $\pm$ 5.4              | -                         | -                      | 1.6        |
| <b>XylNap-primed GAGs</b><br><b>HCC70</b>        | Chondroitinase ABC | -                             | 3.0 $\pm$ 0.3                | 0.56 $\pm$ 0.1               | 15 $\pm$ 0.6              | 81 $\pm$ 1.1              | 0.55 $\pm$ 0.2         | 65         |
|                                                  | Chondroitinase AC  | -                             | 1.4 $\pm$ 0.2                | -                            | 9.1 $\pm$ 0.1             | 88 $\pm$ 0.1              | 1.3 $\pm$ 0.3          | 47         |
|                                                  | Chondroitinase B   | -                             | 26 $\pm$ 3.7                 | -                            | 74 $\pm$ 3.7              | -                         | -                      | 1.3        |
| <b>PG-GAGs untreated</b><br><b>HCC70</b>         | Chondroitinase ABC | -                             | 1.3 $\pm$ 0.5                | 0.71 $\pm$ 0.1               | 18 $\pm$ 3.8              | 79 $\pm$ 4.1              | 0.73 $\pm$ 0.2         | 44         |
|                                                  | Chondroitinase AC  | -                             | -/0.74 <sup>a</sup>          | -                            | 11 $\pm$ 1.2              | 87 $\pm$ 2.6              | 1.3 $\pm$ 0.9          | 34         |
|                                                  | Chondroitinase B   | -                             | -                            | -                            | 100                       | -                         | -                      | 0.39       |
| <b>XylNapOH-primed GAGs</b><br><b>CCD-1095Sk</b> | Chondroitinase ABC | 1.5 $\pm$ 0.1                 | 0.24/1.3 <sup>a</sup>        | 3.4 $\pm$ 0.7                | 56 $\pm$ 5.8              | 38 $\pm$ 4.6              | 0.86 $\pm$ 0.3         | 98         |
|                                                  | Chondroitinase AC  | -                             | -                            | 1.0 $\pm$ 0.1                | 26 $\pm$ 2.9              | 71 $\pm$ 3.2              | 2.8 $\pm$ 0.3          | 44         |
|                                                  | Chondroitinase B   | 6.9 $\pm$ 0.1                 | -                            | -                            | 93 $\pm$ 0.1              | -                         | -                      | 18         |
| <b>XylNap-primed GAGs</b><br><b>CCD-1095Sk</b>   | Chondroitinase ABC | 1.8 $\pm$ 0.1                 | -/0.86 <sup>a</sup>          | 4.1 $\pm$ 0.4                | 55 $\pm$ 4.5              | 38 $\pm$ 4.0              | 1.0 $\pm$ 0.5          | 99         |
|                                                  | Chondroitinase AC  | -                             | -                            | 1.3 $\pm$ 0.2                | 25 $\pm$ 4.7              | 70 $\pm$ 6.5              | 3.0 $\pm$ 1.6          | 38         |
|                                                  | Chondroitinase B   | 7.7 $\pm$ 1.0                 | -/1.2 <sup>a</sup>           | -                            | 92 $\pm$ 1.8              | -                         | -                      | 16         |
| <b>PG-GAGs</b><br><b>untreated CCD-1095Sk</b>    | Chondroitinase ABC | 2.7 $\pm$ 0.8                 | 0.86 $\pm$ 0.1               | 1.2 $\pm$ 0.5                | 81 $\pm$ 4.3              | 14 $\pm$ 3.4              | 0.49 $\pm$ 0.3         | 92         |
|                                                  | Chondroitinase AC  | -                             | -/0.86 <sup>a</sup>          | -/0.97 <sup>a</sup>          | 57 $\pm$ 3.8              | 41 $\pm$ 4.3              | 1.7 $\pm$ 0.8          | 35         |
|                                                  | Chondroitinase B   | 7.2 $\pm$ 1.6                 | -                            | -                            | 93 $\pm$ 1.6              | -                         | -                      | 36         |

| GAGs                                         |                                                        | Disaccharides (mol% ± SD) |                      |                      |                   |                   |                | % of total |
|----------------------------------------------|--------------------------------------------------------|---------------------------|----------------------|----------------------|-------------------|-------------------|----------------|------------|
|                                              |                                                        | ΔUA,2S-GalNAc,4S (B)      | ΔUA-GalNAc,4S,6S (E) | ΔUA,2S-GalNAc,6S (D) | ΔUA-GalNAc,4S (A) | ΔUA-GalNAc,6S (C) | ΔUA-GalNAc (O) |            |
| <b>CS A from bovine trachea<sup>b</sup></b>  | Chondroitinase ABC                                     | -                         | 0.21                 | -                    | 79                | 15                | 5.2            | ~100       |
|                                              | <b>CS B from porcine intestinal mucosa<sup>b</sup></b> | Chondroitinase ABC        | 1.6                  | 3.6                  | 0.22              | 89                | 4.4            | 1.0        |
|                                              | Chondroitinase B                                       | 2.6                       | 3.9                  | -                    | 93                | -                 | -              | 60         |
| <b>CS C from shark cartilage<sup>b</sup></b> | Chondroitinase ABC                                     | -                         | -                    | -                    | 5.4               | 92                | 2.3            | ~100       |

<sup>a</sup> Variability between the different experiments. <sup>b</sup> Calculated based on one experiment.

TABLE S2. **Disaccharide fingerprint of xyloside-primed GAGs and PG-GAGs from HCC70 cells and CCD-1095Sk cells.** Disaccharides from the indicated xyloside-primed GAGs, PG-GAGs, and heparin obtained after degradation with heparinase I-III, followed by AMAC-labeling, and HPLC. The molar percent is calculated based on disaccharide standards of known quantity, and refers to the total molar amount of degraded material by the different enzymes. The percent of total is calculated based on the total amounts (in ng) of all of the disaccharides (including the chondroitinase ABC-generated ones). The data are means of two independent experiments  $\pm$  S.D., unless otherwise stated.

| GAGs                                                          | Disaccharides (mol% $\pm$ SD) |                      |                      |                   |                          |                       |                       |                    | % of total |
|---------------------------------------------------------------|-------------------------------|----------------------|----------------------|-------------------|--------------------------|-----------------------|-----------------------|--------------------|------------|
|                                                               | $\Delta$ UA,2S-GlcNS,6S       | $\Delta$ UA-GlcNS,6S | $\Delta$ UA,2S-GlcNS | $\Delta$ UA-GlcNS | $\Delta$ UA,2S-GlcNAc,6S | $\Delta$ UA-GlcNAc,6S | $\Delta$ UA,2S-GlcNAc | $\Delta$ UA-GlcNAc |            |
| <b>XylNapOH-primed GAGs<br/>24 h HCC70</b>                    | -/2.8 <sup>a</sup>            | 8.4 $\pm$ 0.2        | 5.0 $\pm$ 1.7        | 18 $\pm$ 1.4      | -                        | 13 $\pm$ 2.2          | -                     | 54 $\pm$ 1.3       | 7.4        |
| <b>XylNapOH-primed GAGs<br/>48 h HCC70</b>                    | 2.8 $\pm$ 0.4                 | 7.4 $\pm$ 0.6        | 5.0 $\pm$ 1.1        | 18 $\pm$ 1.4      | 3.1 $\pm$ 0.6            | 15 $\pm$ 0.9          | 3.2 $\pm$ 0.9         | 45 $\pm$ 2.3       | 20         |
| <b>XylNapOH-primed GAGs<br/>72 h HCC70</b>                    | 2.9 $\pm$ 0.1                 | 6.2 $\pm$ 0.3        | 4.9 $\pm$ 1.5        | 17 $\pm$ 2.2      | 4.1 $\pm$ 0.2            | 14 $\pm$ 1.9          | 5.1 $\pm$ 0.8         | 45 $\pm$ 1.2       | 25         |
| <b>XylNap-primed GAGs<br/>HCC70</b>                           | 3.4 $\pm$ 0.6                 | 6.7 $\pm$ 0.4        | 4.9 $\pm$ 1.6        | 18 $\pm$ 1.9      | 2.5 $\pm$ 0.2            | 16 $\pm$ 0.2          | 3.8 $\pm$ 0.8         | 45 $\pm$ 3.6       | 35         |
| <b>PG-GAGs untreated<br/>HCC70</b>                            | 2.2 $\pm$ 0.3                 | 4.3 $\pm$ 0.4        | 3.3 $\pm$ 2.2        | 19 $\pm$ 2.9      | 1.7 $\pm$ 0.3            | 11 $\pm$ 0.8          | 3.7 $\pm$ 0.5         | 55 $\pm$ 4.3       | 56         |
| <b>XylNapOH-primed GAGs<br/>CCD-1095Sk</b>                    | -                             | -                    | 15 $\pm$ 2.8         | 28 $\pm$ 0.4      | -                        | -                     | -                     | 57 $\pm$ 2.3       | 1.5        |
| <b>XylNap-primed GAGs<br/>CCD-1095Sk</b>                      | -                             | -                    | 17 $\pm$ 1.7         | 27 $\pm$ 2.4      | -                        | -                     | -                     | 56 $\pm$ 4.1       | 1.3        |
| <b>PG-GAGs untreated<br/>CCD-1095Sk</b>                       | -/1.9 <sup>a</sup>            | 4.1 $\pm$ 0.4        | 4.1 $\pm$ 0.3        | 23 $\pm$ 0.6      | -                        | 11 $\pm$ 0.6          | -                     | 60 $\pm$ 6.3       | 8.5        |
| <b>Heparin from porcine<br/>intestinal mucosa<sup>b</sup></b> | 68                            | 12                   | 5.7                  | 3.0               | 3.1                      | 3.7                   | 1.8                   | 3.0                | ~100       |

<sup>a</sup> Variability between the different experiments. <sup>b</sup> Calculated based on one experiment.
